# Supplementary material for: Promoting the stability of organic photovoltaics by planar heterojunction optimization
Source: Royal Society of Chemistry journal article supplement (doi:10.1039/d3se00820g), 2023-01-01
Supplement: d3se00820g1.pdf [file d3se00820g1.pdf]

## Supporting Information

### Promoting the Stability of Organic Photovoltaics by Planar Heterojunction optimization

Weixia Lan,<sup>a</sup> Xiaohui Gao,<sup>a</sup> Xian Wu,<sup>a</sup> Qiqi Ding,<sup>a</sup> Wei Shi,<sup>a</sup> Yingjie Liao,<sup>a</sup> Yuanyuan Liu,<sup>a</sup> Wing Chung Tsoi,<sup>\*b</sup> and Bin Wei<sup>\*a</sup>

<sup>a</sup>School of Mechatronic Engineering and Automation, Shanghai University, Shanghai, 200444, China

<sup>b</sup>SPECIFIC, College of Engineering, Swansea University, Swansea, United Kingdom

E-mail: w.c.tsoi@swansea.ac.uk; bwei@shu.edu.cn

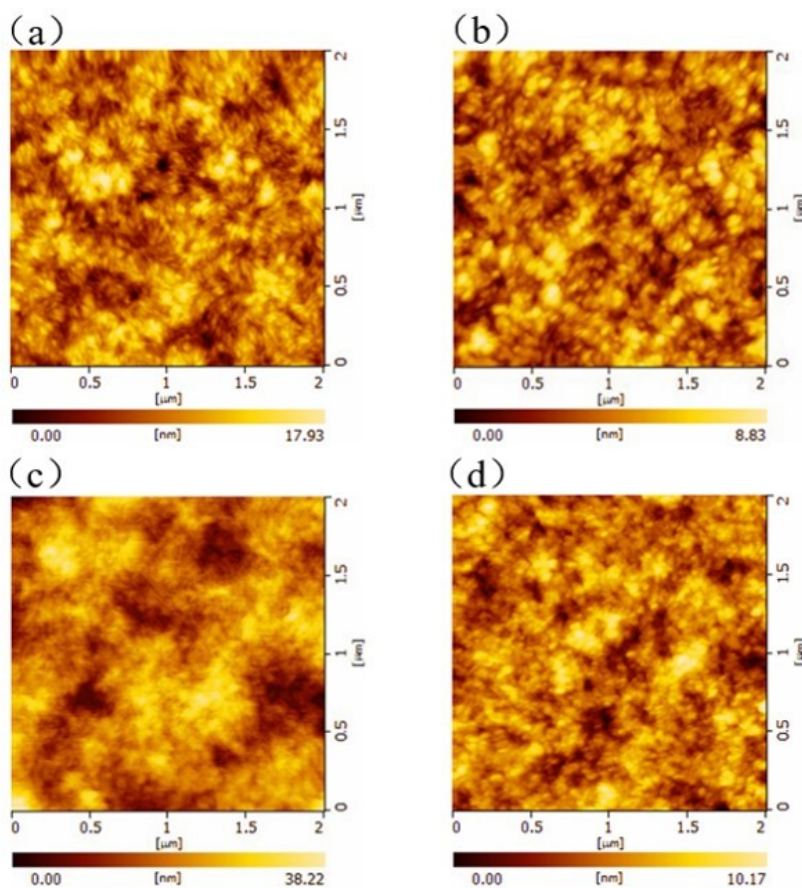

**Fig. S1** AFM images of different time periods: (a) PEDOT: PSS/PBDB-T: ITIC film at 0 h, (b) PEDOT: PSS/PBDB-T/ITIC film at 0 h, (c) PEDOT: PSS/PBDB-T: ITIC film at 120 h, (d) PEDOT: PSS/PBDB-T/ITIC film at 120 h.

**Table S1** Roughness values of PBDB-T: ITIC thin films and PBDB-T/ITIC thin films at different time periods.

| Device       | Time (h) | RMS (nm) |
|--------------|----------|----------|
| PBDB-T: ITIC | 0        | 2.84     |
|              | 120      | 6.10     |

|             |     |      |
|-------------|-----|------|
| PBDB-T/ITIC | 0   | 1.47 |
|             | 120 | 1.61 |

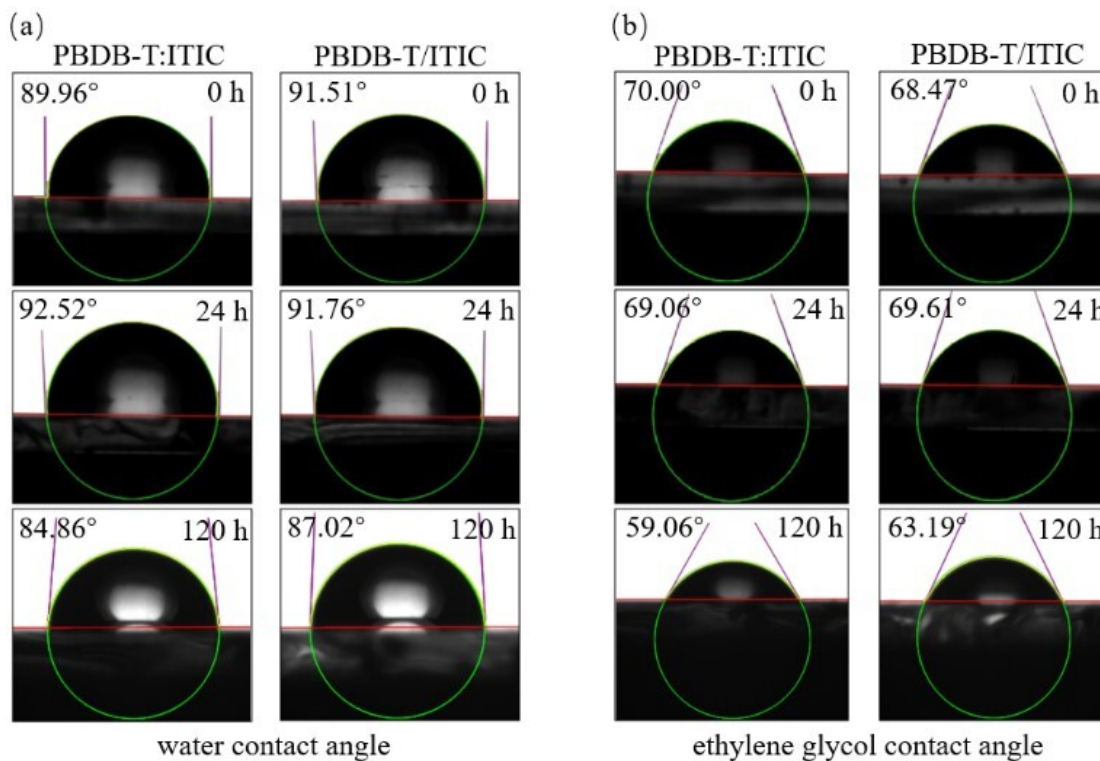

**Fig. S2** Contact angles of PEDOT: PSS/PBDB-T: ITIC film and PEDOT: PPS/PBDB-T/ITIC film at different time periods: (a) water contact angle, (b) ethylene glycol contact angle.

**Table S2** Surface energy parameters of deionized water and ethylene glycol.

| Device          | Surface energy parameters |              |            |
|-----------------|---------------------------|--------------|------------|
|                 | $\gamma_L^d$              | $\gamma_L^p$ | $\gamma_L$ |
| deionized water | 29.30                     | 18.90        | 48.20      |
| ethylene glycol | 22.10                     | 50.70        | 72.80      |

Note:  $\gamma^d$  is the dispersion component,  $\gamma^p$  is the polarity component.

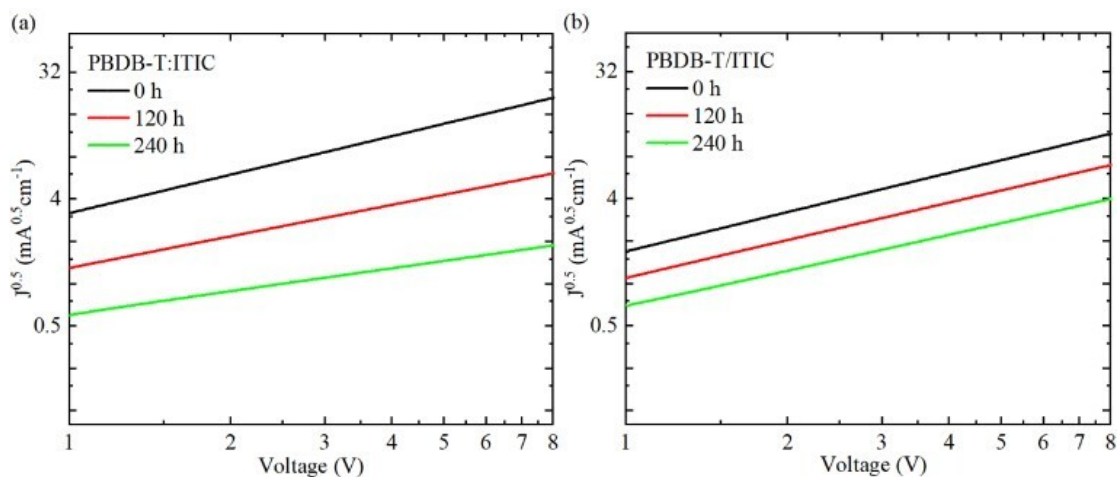

**Fig. S3**  $J^{0.5} - V$  curves for different time periods: (a) based on PBDB-T: ITIC BHJ OPV, (b) based on PBDB-T/ITIC PHJ OPV.

**Table S3** Device performance results based on PBDB-T: ITIC BHJ and PBDB-T/ITIC PHJ.

| Device       | Time (h) | $J_{SC}$ (mA•cm <sup>-2</sup> ) | $V_{OC}$ (V) | $FF$ (%)   | PCE (%)   | $R_s$ (m $\Omega$ ) |
|--------------|----------|---------------------------------|--------------|------------|-----------|---------------------|
| PBDB-T: ITIC | 0        | 15.28±0.25                      | 0.87         | 68.26±0.22 | 9.09±0.32 | 1074                |
|              | 120      | 10.21±0.15                      | 0.60         | 43.01±0.28 | 2.64±0.21 | 14904               |
|              | 240      | 4.51±0.19                       | 0.42         | 35.77±0.20 | 0.68±0.23 | 19128               |
| PBDB-T/ITIC  | 0        | 10.21±0.21                      | 0.81         | 60.72±0.24 | 5.03±0.27 | 1527                |
|              | 120      | 7.46±0.22                       | 0.76         | 51.23±0.15 | 2.98±0.24 | 9989                |
|              | 240      | 5.34±0.19                       | 0.61         | 47.99±0.21 | 1.57±0.18 | 15804               |

Note: results are averaged from more than 20 devices.

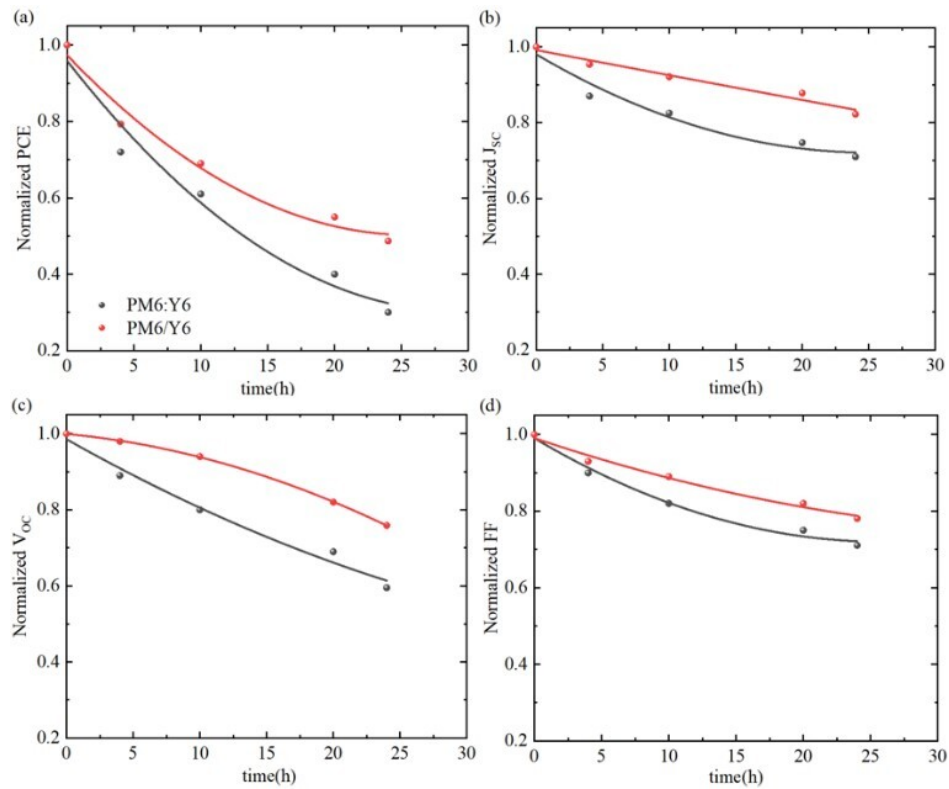

**Fig. S4** Normalized (a) PCE, (b)  $J_{SC}$ , (c)  $V_{OC}$ , and (d)  $FF$  over time based on PM6: Y6 BHJ and PM6/Y6 PHJ OPV measurements.

**Table S4** Device performance results based on PM6: Y6 BHJ and PM6/Y6 PHJ OPV.

| Device  | Time (h) | $J_{SC}$ (mA•cm <sup>-2</sup> ) | $V_{OC}$ (V) | $FF$ (%)   | PCE (%)    |
|---------|----------|---------------------------------|--------------|------------|------------|
| PM6: Y6 | 0 h      | 26.59±0.30                      | 0.84         | 67.26±0.27 | 15.05±0.32 |
|         | 24 h     | 18.88±0.26                      | 0.50         | 47.80±0.25 | 4.52±0.28  |
| PM6/Y6  | 0 h      | 23.36±0.22                      | 0.83         | 62.43±0.30 | 12.13±0.28 |

24 h

19.21±0.24

0.63

48.75±0.26

5.91±0.25

Note: results are averaged form more than 20 devices.

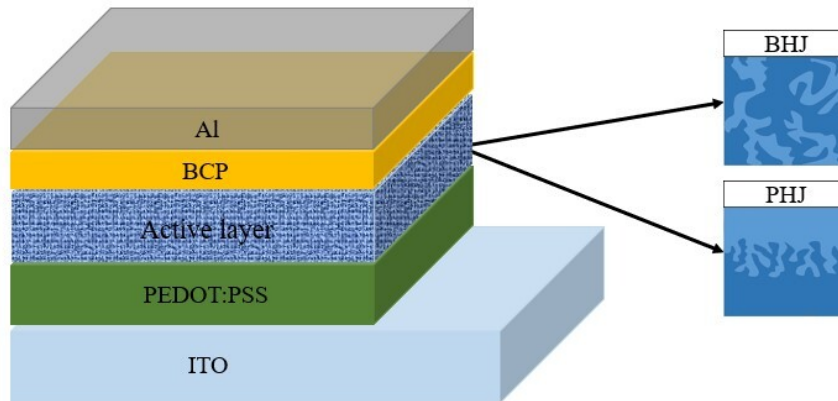

Fig. S5 The schematic diagram of the device structure prepared in this work.

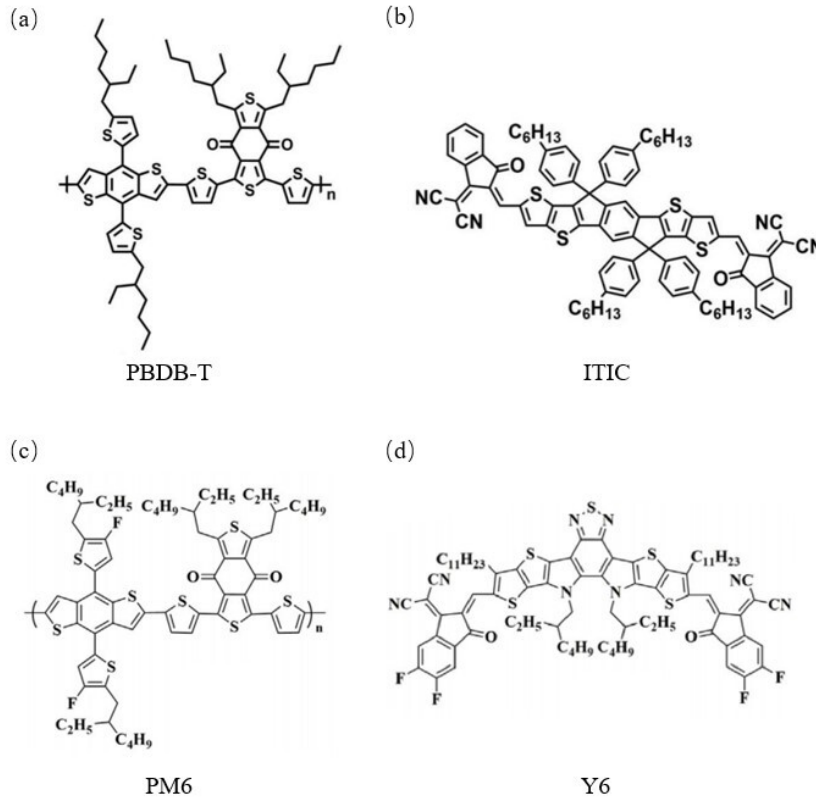

Fig. S6 Active layer materials used in this work: (a) PBDB-T, (b) ITIC, (c) PM6, (d) Y6.

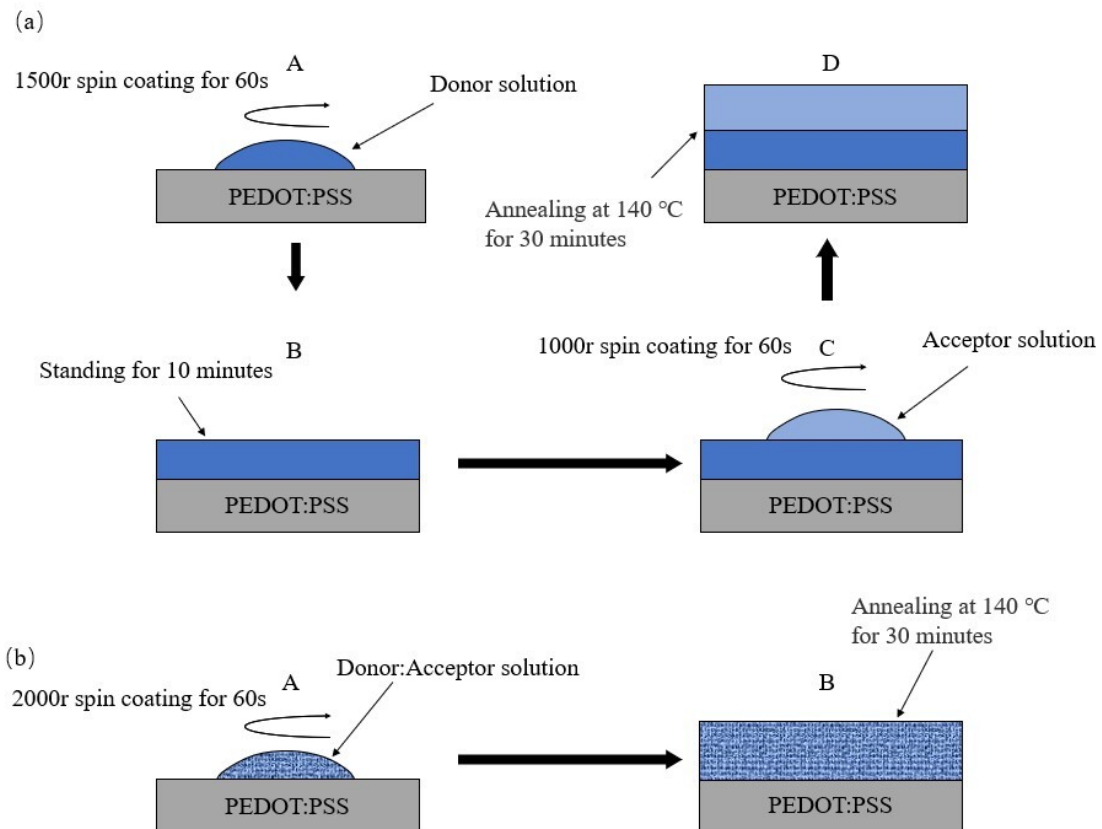

**Fig. S7** Flow chart of active layer preparation: (a) PHJ, (b) BHJ.
